# Supplementary material for: Construction of myoglobin–amphiphilic alginate caprylamide–graphene composite modified electrode for the direct electron transfer between redox proteins and electrode and electrocatalysis of myoglobin
Source: Royal Society of Chemistry journal article supplement (doi:10.1039/c8ra07117a), 2018-01-01
Supplement: c8ra07117a1.pdf [file c8ra07117a1.pdf]

## Support Information

### Construction of myoglobin-amphiphilic alginate caprylamide-graphene composite modified electrode for the direct electrochemistry and electrocatalysis of myoglobin

Xiuqiong Chen<sup>a,b</sup>, Huiqiong Yan<sup>a,b,\*</sup>, Wei Sun<sup>b</sup>, Guangying Chen<sup>a</sup>, Changjiang Yu<sup>b</sup>, Wen Feng<sup>b</sup>,  
Qiang Lin<sup>a,b,\*</sup>

<sup>a</sup> Key Laboratory of Tropical Medicinal Plant Chemistry of Ministry of Education, College of Chemistry and Chemical Engineering, Hainan Normal University, Haikou 571158, China.

<sup>b</sup> Key Laboratory of Water Pollution Treatment & Resource Reuse of Hainan province, College of chemistry and chemical engineering, Hainan Normal University, Haikou 571158, Hainan, China.

\*Corresponding author: Huiqiong Yan, Tel.: +86 0898 65884995. E-mail address: yanhqedu@163.com; Qiang Lin, Tel.: +86 0898 65889422. E-mail address: linqianggroup@163.com.

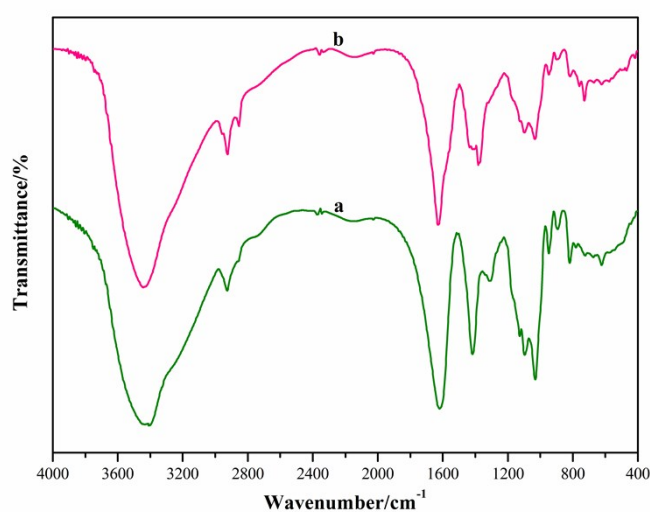

Fig. S1. FT-IR spectra of (a) sodium alginate and (b) ACA.

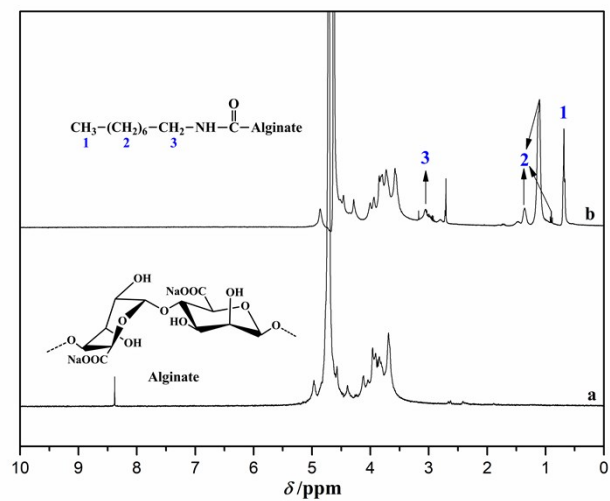

Fig. S2.  $^1\text{H}$  NMR spectra of (a) sodium alginate and (b) ACA.
